# Supplementary material for: A three-gene signature based on tumour microenvironment predicts overall survival of osteosarcoma in adolescents and young adults
Source: Aging (Albany NY). 2020 Dec 3;13(1):619–45. doi: 10.18632/aging.202170 (PMC7835013; doi:10.18632/aging.202170)
Supplement: Supplementary Figures [file aging-13-202170-s001.pdf]

[www.aging-us.com](http://www.aging-us.com)

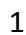

## AGING

**Supplementary Figure 2. Calibration plot of the nomogram model for predicting the probability of OS at 1, 3, and 5 years.**  
(A) 1-year calibration curve. (B) 3-year calibration curve. (C) 5-year calibration curve.

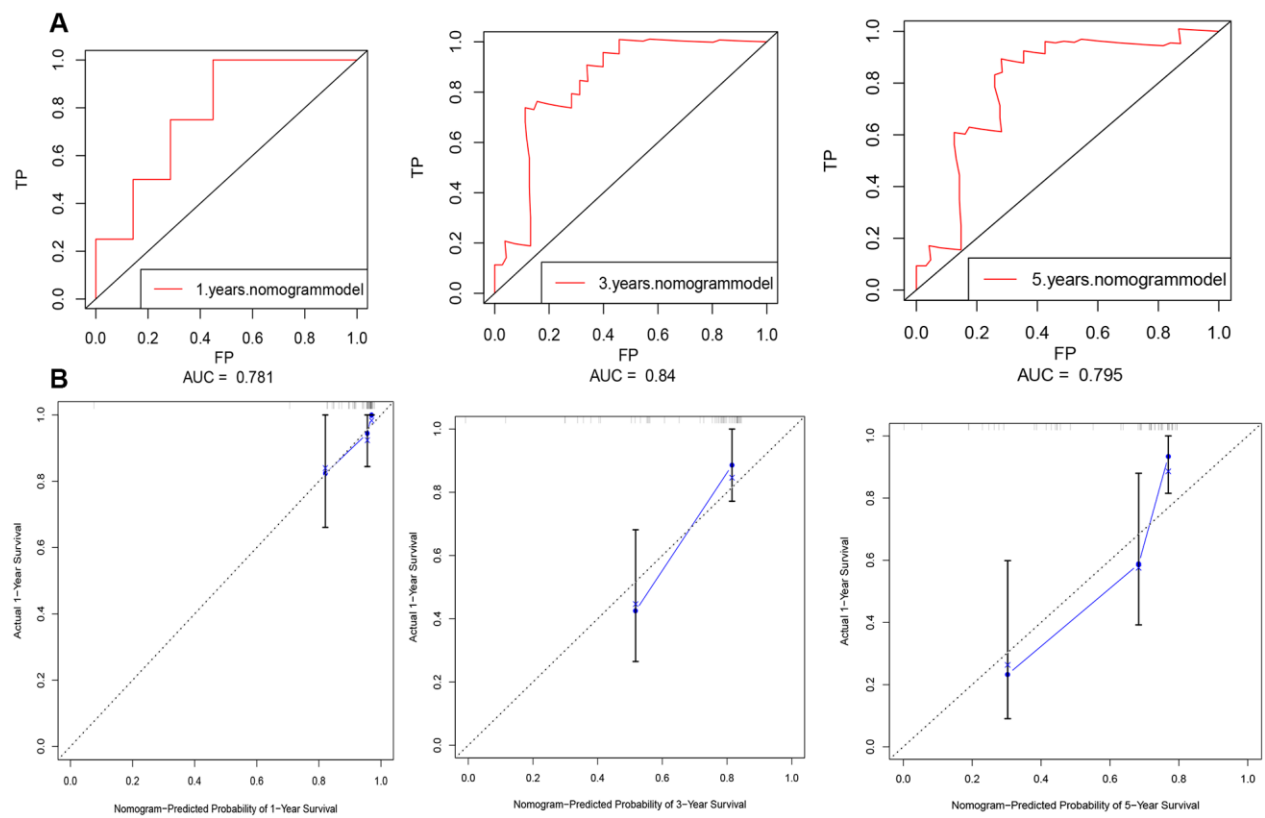

**Supplementary Figure 3.** (A) 1, 3 and 5-year ROC curve for survival prediction of osteosarcoma patients by nomogram model in GSE21257. (B) 1, 3 and 5-year calibration plot for survival prediction of osteosarcoma patients by nomogram model in GSE21257.
