# Supplementary material for: A three-gene signature based on tumour microenvironment predicts overall survival of osteosarcoma in adolescents and young adults
Source: publisher site journal article supplement (doi:10.18632/aging.202170), 2020-12-03
Supplement: Supplementary file [file aging-v13i1-202170-supplementary-material-SD5.pdf]

## SUPPLEMENTARY TABLES

Supplementary Table 4. The intersection of differential genes between high and low score groups.

| Gene          | Regulation |
|---------------|------------|
| CCL14         | up         |
| CCR2          | up         |
| FCGR1A        | up         |
| FCGR1B        | up         |
| FCGR1C        | up         |
| FCGR2B        | up         |
| GAPT          | up         |
| GIMAP5        | up         |
| IGHG2         | up         |
| IGHM          | up         |
| IGHV1-24      | up         |
| IGKV3-11      | up         |
| IL10          | up         |
| IL2RA         | up         |
| LILRA1        | up         |
| LILRA2        | up         |
| LLNLR-470E3.1 | up         |
| MS4A14        | up         |
| P2RY10        | up         |
| PLD4          | up         |
| RP11-24F11.2  | up         |
| RP11-455F5.5  | up         |
| RP11-494O16.3 | up         |
| RP11-733O18.1 | up         |
| RP11-84C10.2  | up         |
| TLR7          | up         |
| TLR8          | up         |
| TNFSF8        | up         |
| TRBV29-1      | up         |
| TRBV7-3       | up         |
| VENTX         | up         |
| AC003988.1    | down       |
| AC013470.6    | down       |
| COCH          | down       |
| EMILIN3       | down       |
| FAM60BP       | down       |
| GS1-309P15.4  | down       |
| HAUS6P1       | down       |

---

|               |      |
|---------------|------|
| HK2P1         | down |
| MAP3K15       | down |
| RP1-290I10.2  | down |
| RP11-283C24.1 | down |
| RPRML         | down |

---

**Supplementary Table 5. Screening of genes affecting prognosis of osteosarcoma patients by univariate Cox regression analysis.**

| <b>Id</b>   | <b>HR</b>   | <b>HR.95 L</b> | <b>HR.95 H</b> | <b>P value</b> |
|-------------|-------------|----------------|----------------|----------------|
| ARHGAP9     | 0.51087512  | 0.279370094    | 0.934220925    | 0.029190049    |
| ARL11       | 0.2925651   | 0.106229156    | 0.805751841    | 0.017415939    |
| CARD11      | 0.366473556 | 0.135386517    | 0.991995883    | 0.048179537    |
| CCL2        | 0.554934323 | 0.361183981    | 0.852618385    | 0.007196217    |
| COCH        | 1.444447813 | 1.154257554    | 1.807594396    | 0.001310445    |
| COLEC10     | 2.165998823 | 1.213980939    | 3.864600135    | 0.008886882    |
| DENND1C     | 0.40798314  | 0.170180199    | 0.978082315    | 0.044469242    |
| FCGR2B      | 0.330313897 | 0.122811646    | 0.888411433    | 0.028209966    |
| GPR65       | 0.367016467 | 0.149575271    | 0.9005572      | 0.028620701    |
| HSPD1P5     | 5.996700537 | 1.928439911    | 18.64741397    | 0.00197144     |
| HTR2B       | 0.173056522 | 0.037741629    | 0.793515297    | 0.023968604    |
| IGHG2       | 0.695364235 | 0.487357095    | 0.992150157    | 0.045132177    |
| IL2RA       | 0.247279044 | 0.077194996    | 0.792109969    | 0.018656486    |
| ITGAM       | 0.472112561 | 0.266834219    | 0.835313669    | 0.009935059    |
| KBTBD11-OT1 | 3.569424862 | 1.869198572    | 6.816179958    | 0.000115665    |
| LAG3        | 0.438454408 | 0.197341701    | 0.974159375    | 0.042945491    |
| LILRB2      | 0.516296389 | 0.28565598     | 0.933157295    | 0.028593342    |
| LILRB4      | 0.560448573 | 0.358927426    | 0.875114524    | 0.010874652    |
| LRRC25      | 0.629703223 | 0.399797335    | 0.991817892    | 0.045998229    |
| MIR4666A    | 2.388143135 | 1.302508685    | 4.378648448    | 0.004886248    |
| MS4A4A      | 0.609618914 | 0.409457223    | 0.907628928    | 0.014799605    |
| MYOM2       | 1.673891374 | 1.229811511    | 2.278326645    | 0.001056289    |
| NCF1B       | 0.256873893 | 0.086789752    | 0.760276362    | 0.014088033    |
| NCF4        | 0.630684051 | 0.422394571    | 0.941684386    | 0.024212517    |
| PCED1B      | 0.373265768 | 0.164832238    | 0.845267499    | 0.01812482     |
| PDE1B       | 0.128492357 | 0.028553448    | 0.578223886    | 0.007499985    |
| PIK3R5      | 0.345663883 | 0.141728729    | 0.843043756    | 0.019527423    |
| RASGRP4     | 0.262925485 | 0.098455778    | 0.702140718    | 0.007685921    |
| SNX20       | 0.267559459 | 0.087584958    | 0.817355696    | 0.020671466    |
| TNFSF8      | 0.256172732 | 0.088599698    | 0.740685017    | 0.011933582    |
| TRBV7-3     | 0.061055107 | 0.004092557    | 0.910855004    | 0.042593103    |
| VSIG4       | 0.663373939 | 0.489320843    | 0.899338314    | 0.008210926    |

**Supplementary Table 6. Immune-related differential genes in high and low risk group.**

| <b>Gene</b> | <b>Low risk</b> | <b>High risk</b> | <b>Log FC</b> | <b>P Value</b> | <b>FDR</b>  |
|-------------|-----------------|------------------|---------------|----------------|-------------|
| C3          | 2.101113494     | 0.993065337      | -1.081193548  | 3.42E-06       | 0.000164068 |
| CCL23       | 0.163230344     | 0.078820756      | -1.050261781  | 0.007313622    | 0.035887774 |
| CD3D        | 1.257976912     | 0.581421327      | -1.113449547  | 3.45E-05       | 0.000757924 |
| CD3E        | 1.234124531     | 0.559110455      | -1.142282751  | 2.65E-06       | 0.000162902 |
| CNTFR       | 0.763638404     | 1.740009475      | 1.188133599   | 0.008324904    | 0.039384637 |
| COLEC10     | 0.116194113     | 0.342232389      | 1.558439322   | 3.88E-05       | 0.000805077 |
| CSPG5       | 0.331461945     | 0.664455344      | 1.003329      | 5.66E-06       | 0.000232374 |
| CX3CR1      | 1.310084234     | 0.647589283      | -1.016508559  | 0.000112751    | 0.001950043 |
| CXCR3       | 0.864951829     | 0.425292057      | -1.024165878  | 1.88E-05       | 0.000505711 |
| CXCR6       | 0.42387118      | 0.211257015      | -1.004626627  | 0.000203797    | 0.003205921 |
| FCGR2B      | 0.925072469     | 0.353461012      | -1.388015301  | 6.26E-09       | 4.34E-06    |
| IGHM        | 1.600302821     | 0.779517085      | -1.03769238   | 0.004409497    | 0.027274265 |
| IL2RA       | 0.770377786     | 0.294716765      | -1.386236974  | 3.42E-06       | 0.000164068 |
| PAK6        | 0.013952663     | 0.047304117      | 1.761425248   | 0.005420618    | 0.02981382  |
| PRLHR       | 0.015912746     | 0.035923823      | 1.174758031   | 0.009123249    | 0.041138437 |
| PROK2       | 0.357443064     | 0.932191954      | 1.382913603   | 0.001419738    | 0.011887491 |
| PTHLH       | 0.467021326     | 0.15219946       | -1.617525187  | 0.000558506    | 0.006400523 |
| RETN        | 0.403612052     | 0.074929169      | -2.429369894  | 0.000337595    | 0.004686353 |
| RNASE2      | 1.131581553     | 0.441860267      | -1.356678453  | 3.89E-05       | 0.000805077 |
| TLR7        | 1.040862022     | 0.519912736      | -1.001437434  | 2.79E-06       | 0.000162902 |
| TRAV1-2     | 0.179271881     | 0.061862702      | -1.535007475  | 0.000217345    | 0.003229565 |
| TRAV14DV4   | 0.209995614     | 0.055742782      | -1.913502272  | 0.000922779    | 0.008931487 |
| TRBC2       | 1.572979597     | 0.750764535      | -1.067067551  | 7.74E-05       | 0.001432748 |
| TRBV12-4    | 0.278282339     | 0.138663227      | -1.00496411   | 0.005634189    | 0.030482407 |
| TRBV20-1    | 0.625931807     | 0.136296403      | -2.199257999  | 1.42E-05       | 0.00039359  |
| TRBV28      | 0.980494657     | 0.45568394       | -1.105476244  | 0.000227234    | 0.003329603 |
| TRBV29-1    | 0.230535009     | 0.09849979       | -1.226793302  | 0.005011945    | 0.029217714 |
| TRBV4-2     | 0.288890712     | 0.060070621      | -2.265792342  | 0.000564217    | 0.006400523 |
| TRBV6-5     | 0.302632378     | 0.119943755      | -1.335208298  | 0.007216178    | 0.035887774 |
| TRBV7-3     | 0.259605434     | 0.063285289      | -2.0363785    | 8.82E-06       | 0.00026592  |
| TRDC        | 1.285825752     | 0.538065431      | -1.256841623  | 0.000919254    | 0.008931487 |
